# Supplementary material for: Characterization of a New Citrus Mutant Induced by Gamma Irradiation with a Unique Fruit Shape, Gwonje-Early, and Determination of Specific Selection Markers Using Allele-Specific PCR
Source: MDPI journal article supplement (doi:10.3390/plants13060911), 2024-03-21
Supplement: s1 [file s1]

**Table S1.** SNP detection in samples

| Sample              | No. of Total SNPs | No. of Homozygous SNPs <sup>1</sup> | No. of Heterozygous SNPs <sup>2</sup> | No. of Other SNPs <sup>3</sup> |
|---------------------|-------------------|-------------------------------------|---------------------------------------|--------------------------------|
| WT                  | 1,198,650         | 8,208                               | 572,811                               | 617,631                        |
| <i>Gwonje-early</i> | 1,204,414         | 7,339                               | 604,548                               | 592,527                        |

<sup>1</sup> In the same SNP types, 90% of sample reads mapped to the reference genome. <sup>2</sup> In the same SNP types, 40%–60% of sample reads mapped to the reference genome. <sup>3</sup> Not classified as homozygous or heterozygous

**Table S2.** SNP classification by genome annotation

| Sample              | Total SNPs | Classified SNPs <sup>1</sup> | IGR <sup>2</sup> & gene structure | Total   | Homozygous | Heterozygous | Others <sup>3</sup> |
|---------------------|------------|------------------------------|-----------------------------------|---------|------------|--------------|---------------------|
| WT                  | 1,198,650  | 1,083,127                    | intergenic                        | 715,536 | 5,577      | 318,289      | 391,670             |
|                     |            |                              | genic region                      | 367,591 | 1,338      | 209,859      | 156,394             |
|                     |            |                              | exon                              | 164,743 | 605        | 94,330       | 69,808              |
|                     |            |                              | intron                            | 212,665 | 776        | 120,993      | 90,896              |
| <i>Gwonje-early</i> | 1,193,106  | 1,078,912                    | intergenic                        | 719,688 | 4,927      | 334,369      | 380,392             |
|                     |            |                              | genic region                      | 370,813 | 1,204      | 224,700      | 144,909             |
|                     |            |                              | exon                              | 165,449 | 561        | 100,802      | 64,086              |
|                     |            |                              | intron                            | 215,387 | 673        | 129,724      | 84,990              |

<sup>1</sup> Loci where genes were organized in the reference gene annotation (gff) file and could be classified as genic/intergenic. <sup>2</sup> Intergenic region. <sup>3</sup> Not classified as homozygous or heterozygous

**Table S3.** InDel detection in samples

| Sample              | No. of Total InDel Variants |               | No. of Homozygous Variants <sup>1</sup> |             | No. of Heterozygous Variants <sup>2</sup> |               | No. of Other Variants <sup>3</sup> |               |
|---------------------|-----------------------------|---------------|-----------------------------------------|-------------|-------------------------------------------|---------------|------------------------------------|---------------|
|                     | Total (InDels)              | In/Del        | Total (InDels)                          | In/Del      | Total (InDels)                            | In/Del        | Total (InDels)                     | In/Del        |
| WT                  | 172,259                     | 88,264/83,995 | 3,751                                   | 1,600/2,151 | 57,930                                    | 29,136/28,794 | 110,578                            | 57,528/53,050 |
| <i>Gwonje-early</i> | 167,284                     | 84502/82782   | 4,050                                   | 1693/2,357  | 55,773                                    | 27,804/27,969 | 107,461                            | 55,005/52,456 |

<sup>1</sup> In the same SNP type, 90% of sample reads mapped to the reference genome. <sup>2</sup> In the same SNP type, 40%~60% of sample reads mapped to the reference genome. <sup>3</sup> Not classified as homozygous or heterozygous

**Table S4.** InDel classification by genome annotation

| Sample              | Total InDels | Classified InDel variants <sup>1</sup> | IGR <sup>2</sup> & gene structure | Total   | Homozygous | Heterozygous | Other <sup>3</sup> |
|---------------------|--------------|----------------------------------------|-----------------------------------|---------|------------|--------------|--------------------|
| WT                  | 172,259      | 155,928                                | intergenic                        | 110,566 | 2,429      | 35,781       | 72,187             |
|                     |              |                                        | genic region                      | 45,362  | 632        | 17,495       | 27,145             |
|                     |              |                                        | exon                              | 11,128  | 295        | 4,149        | 6,684              |
|                     |              |                                        | intron                            | 35,441  | 359        | 13,863       | 21,219             |
| <i>Gwonje-early</i> | 172,154      | 155,751                                | intergenic                        | 106,902 | 2,621      | 34,280       | 70,001             |
|                     |              |                                        | genic region                      | 44,352  | 661        | 17,075       | 26,616             |
|                     |              |                                        | exon                              | 10,930  | 297        | 3,957        | 6,676              |
|                     |              |                                        | intron                            | 34,601  | 390        | 13,610       | 20,601             |

<sup>1</sup> Loci where genes were organized in the reference gene annotation (gff) file and could be classified as genic/intergenic. <sup>2</sup> Intergenic region. <sup>3</sup> Not classified as homozygous or heterozygous

※ In cases where the reference gene position overlaps or due to the anti-sense form of the gene, the number of exons and introns may be counted twice.

**Table S5.** Homo-type SNPs and InDels annotated in gene regions

| Type  | WT | <i>Gwonje-early</i> | Locus ID    | Protein ID     | Description                      | Species                  |
|-------|----|---------------------|-------------|----------------|----------------------------------|--------------------------|
| SNP   | A  | T                   | CUMW_094980 | XP_006486565.1 | Glutamate receptor 3.2           | <i>Citrus sinensis</i>   |
| SNP   | G  | T                   | CUMW_259270 | GAY67788.1     | Hypothetical protein CUMW_259270 | <i>Citrus unshiu</i>     |
| InDel | *  | -1A                 | CUMW_151040 | XP_006421650.1 | NO-associated protein 1          | <i>Citrus clementina</i> |

**Table S6.** Primers used in AS-PCR

|   | Primer Name |    | Primer Sequence              |    |
|---|-------------|----|------------------------------|----|
|   | GJ-SNP1 F   | 5- | CAACAGGAAAGCAGGCCAATG        | -3 |
| 1 | GJ-SNP1 R   | 5- | TGCTGAGCCAAGTGGTTACA         | -3 |
|   | Con-SNP1 R  | 5- | GCTGCACCCCGGATTTTCTT         | -3 |
| 2 | GJ-SNP2 F   | 5- | GTCGTTGCAAGAACCCTGT          | -3 |
|   | GJ-SNP2 R   | 5- | TCATTGAGAAGATTATCACTACTGT    | -3 |
| 3 | GJ-SNP3 F   | 5- | GTCCTTGTGAAAAATGTTGAAGT      | -3 |
|   | GJ-SNP3 R   | 5- | TTTCGCATGTGAAGTGTCTT         | -3 |
|   | Con-SNP4 F  | 5- | ATCCACCAGACATTAAGCTTCGT      | -3 |
| 4 | GJ-SNP4 F   | 5- | CAGGTTGTCGCTTTTGTGAA         | -3 |
|   | GJ-SNP4 R   | 5- | CTATTCATAACGTTTTGAGTCATAACGA | -3 |
| 5 | GJ-SNP5 F   | 5- | GACGGTCATGATTTAATTGTTGGT     | -3 |
|   | GJ-SNP5 R   | 5- | TTTGTGACCGACTCATTTG          | -3 |
